# Supplementary material for: Enasidenib vs conventional care in older patients with late-stage mutant-IDH2 relapsed/refractory AML: a randomized phase 3 trial
Source: PubMed Central journal article supplement — Blood. 2022 Jun 20;141(2):156–67. doi: 10.1182/blood.2021014901 (PMC10644040; doi:10.1182/blood.2021014901), 2022-06-20
Supplement: BLOOD_BLD-2021-014901-mmc1.pdf [file BLOOD_BLD-2021-014901-mmc1.pdf]

**Supplemental Table 1. Reasons for exclusion from the mITT analyses**

| <b>Reason, n</b>                                        | <b>Enasidenib<br/>(n=68 excluded from mITT)*</b> | <b>CCR<br/>(n=81 excluded from mITT)*</b> |
|---------------------------------------------------------|--------------------------------------------------|-------------------------------------------|
| No retrospectively centrally confirmed diagnosis of AML | 52                                               | 45                                        |
| Violated inclusion/exclusion criteria                   | 23                                               | 31                                        |
| Did not receive randomized treatment                    | 1                                                | 20                                        |
| No post-randomization efficacy assessment               | 1                                                | 18                                        |

AML, acute myeloid leukemia; CCR, conventional care regimen; mITT, modified intention-to-treat.

\*Patients may have met >1 criterion.

**Supplemental Table 2. Baseline characteristics and prior AML treatment history in the modified intent-to-treat (mITT) population**

| <b>Characteristic</b>                    | <b>Enasidenib<br/>(n=90)</b> | <b>CCR<br/>(n=80)</b> | <b>Total<br/>(N=170)</b> |
|------------------------------------------|------------------------------|-----------------------|--------------------------|
| Age, years, median (range)               | 72 (60-84)                   | 69 (60-84)            | 71 (60-84)               |
| Age ≥80 years, n (%)                     | 8 (9)                        | 4 (5)                 | 12 (7)                   |
| <b>Sex, n (%)</b>                        |                              |                       |                          |
| Male                                     | 53 (59)                      | 50 (63)               | 103 (61)                 |
| Female                                   | 37 (41)                      | 30 (38)               | 67 (39)                  |
| <b>AML diagnosis, n (%)</b>              |                              |                       |                          |
| de novo                                  | 57 (63)                      | 53 (66)               | 110 (65)                 |
| Secondary                                | 33 (37)                      | 27 (34)               | 60 (35)                  |
| Months since AML diagnosis, median       | 13.0                         | 12.0                  | 12.0                     |
| <b>WHO AML classification, n (%)</b>     |                              |                       |                          |
| AML not otherwise specified              | 46 (51)                      | 44 (55)               | 90 (53)                  |
| AML with myelodysplasia-related changes  | 24 (27)                      | 22 (28)               | 46 (27)                  |
| AML with recurrent genetic abnormalities | 16 (18)                      | 12 (15)               | 28 (16)                  |
| Therapy related myeloid neoplasms        | 4 (4)                        | 2 (3)                 | 6 (4)                    |
| <b>IDH2 mutation type, n (%)</b>         |                              |                       |                          |
| <i>IDH2</i> -R140                        | 70 (78)                      | 59 (74)               | 129 (76)                 |
| <i>IDH2</i> -R172                        | 20 (22)                      | 21 (26)               | 41 (24)                  |
| <b>ECOG PS, n (%)</b>                    |                              |                       |                          |
| 0                                        | 22 (24)                      | 14 (18)               | 36 (21)                  |
| 1                                        | 54 (60)                      | 50 (63)               | 104 (61)                 |
| 2                                        | 14 (16)                      | 16 (20)               | 30 (18)                  |
| <b>ELN risk status, n (%)</b>            |                              |                       |                          |
| Favorable                                | 8 (9)                        | 5 (6)                 | 13 (7)                   |
| Intermediate                             | 13 (14)                      | 12 (15)               | 25 (15)                  |
| Adverse                                  | 61 (68)                      | 53 (66)               | 114 (67)                 |

|                                               |                 |                |                 |
|-----------------------------------------------|-----------------|----------------|-----------------|
| NE                                            | 8 (9)           | 10 (13)        | 18 (11)         |
| Bone marrow blasts, %, median (range)         | 47 (6-99)       | 50 (5-98)      | 48 (5-99)       |
| <b>Hematologic parameters, median (range)</b> |                 |                |                 |
| ANC, 10 <sup>9</sup> /L                       | 0.41 (0.0-15.4) | 0.51 (0.0-8.1) | 0.43 (0.0-15.4) |
| Hemoglobin, g/L                               | 94 (57-136)     | 91 (54-132)    | 92 (54-136)     |
| WBC, 10 <sup>9</sup> /L                       | 2.5 (0.2-45)    | 2.8 (0.3-52)   | 2.6 (0.2-52)    |
| Platelets, 10 <sup>9</sup> /L                 | 37 (4-538)      | 35 (6-685)     | 37 (4-685)      |
| <b>Number of prior AML therapies,* n (%)</b>  |                 |                |                 |
| 2                                             | 70 (78)         | 61 (76)        | 131 (77)        |
| 3                                             | 29 (22)         | 19 (24)        | 39 (23)         |
| Prior intensive chemotherapy, n (%)           | 67 (74)         | 60 (75)        | 127 (75)        |
| Prior stem cell transplant, n (%)             | 8 (9)           | 8 (10)         | 16 (9)          |
| Primary refractory AML,* n (%)                | 41 (46)         | 35 (44)        | 76 (45)         |
| <b>Prior relapse status, n (%)</b>            |                 |                |                 |
| 2 prior relapses                              | 7 (8)           | 11 (14)        | 18 (11)         |
| First remission ≤ 1 year                      | 5 (6)           | 10 (13)        | 15 (9)          |

AML, acute myeloid leukemia; ANC, absolute neutrophil count; CCR, conventional care regimen; CR, complete remission; CRi, CR with incomplete hematologic recovery; CRp, CR with incomplete platelet recovery; ECOG PS, Eastern Cooperative Oncology Group performance status; ELN, European LeukemiaNet; IQR, interquartile range; NE, not estimable; WBC, white blood cell; WHO, World Health Organization.

\*Never attained CR, CRi, or CRp during prior AML-directed therapy.

**Supplemental Table 3. Survival and response outcomes within CCR preselection subgroups**

|                                     | Preselection: Azacitidine<br>(n=142) |                           | Preselection: IDAC<br>(n=52) |                           | Preselection: LDAC<br>(n=72) |                          | Preselection: BSC only<br>(n=53) |                          |
|-------------------------------------|--------------------------------------|---------------------------|------------------------------|---------------------------|------------------------------|--------------------------|----------------------------------|--------------------------|
|                                     | Enasidenib<br>(n=73)                 | Azacitidine<br>(n=69)     | Enasidenib<br>(n=19)         | IDAC<br>(n=33)            | Enasidenib<br>(n=35)         | LDAC<br>(n=37)           | Enasidenib<br>(n=31)             | BSC only<br>(n=22)       |
| <b>OS, months, median (95% CI)</b>  | <b>10.2<br/>(6.0-19.4)</b>           | <b>7.7<br/>(5.7-10.8)</b> | <b>6.2<br/>(2.2-7.6]</b>     | <b>6.6<br/>(4.1-11.9)</b> | <b>5.9<br/>(4.4-7.6)]</b>    | <b>4.7<br/>(3.0-7.0)</b> | <b>5.4<br/>(2.8-12.5)</b>        | <b>2.1<br/>(1.3-8.5)</b> |
| ENA vs CCR: HR (95% CI)             | 0.97 (0.65-1.46)                     |                           | NE                           |                           | 0.65 (0.38-1.11)             |                          | 0.66 (0.3-1.23)                  |                          |
| 1-year survival rate, %             | 46.3                                 | 31.9                      | 15.8                         | 29.0                      | 34.3                         | 21.0                     | 34.6                             | 14.3                     |
| <b>EFS, months, median (95% CI)</b> | <b>6.0<br/>(3.9-9.3)</b>             | <b>4.6<br/>(2.6-6.2)</b>  | <b>3.4<br/>(2.0-7.4)</b>     | <b>1.4<br/>(0.8-11.0)</b> | <b>4.7<br/>(3.0-5.9)</b>     | <b>2.1<br/>(1.1-4.7)</b> | <b>3.7<br/>(1.5-5.8)</b>         | <b>1.5<br/>(0.4-1.9)</b> |
| ENA vs CCR: HR (95% CI)             | 0.80 (0.51-1.24)                     |                           | NE                           |                           | 0.65 (0.36-1.18)             |                          | 0.34 (0.15-0.77)                 |                          |
| <b>ORR, n/N (%)</b>                 | <b>38/73 (52)</b>                    | <b>12/69 (17)</b>         | <b>7/19 (37)</b>             | <b>2/33 (6)</b>           | <b>9/35 (26)</b>             | <b>2/37 (5)</b>          | <b>10/31 (32)</b>                | <b>0/22 (0)</b>          |
| ENA vs CCR: OR (95% CI)             | 4.4 (2.0-9.6)                        |                           | NE                           |                           | 5.3 (1.1-26.8)               |                          | NE                               |                          |
| <b>Best response, n (%)</b>         |                                      |                           |                              |                           |                              |                          |                                  |                          |
| CR                                  | 28 (38)                              | 4 (6)                     | 1 (5)                        | 2 (6)                     | 2 (6)                        | 0                        | 6 (19)                           | 0                        |
| CRi/CRp                             | 4 (5)                                | 3 (4)                     | 2 (11)                       | 0                         | 1 (3)                        | 1 (3)                    | 3 (10)                           | 0                        |
| PR                                  | 4 (5)                                | 0                         | 0                            | 0                         | 3 (9)                        | 0                        | 0                                | 0                        |
| MLFS                                | 2 (3)                                | 5 (7)                     | 4 (21)                       | 0                         | 3 (9)                        | 0                        | 1 (3)                            | 0                        |
| Stable disease                      | 25 (34)                              | 28 (41)                   | 7 (37)                       | 10 (30)                   | 20 (57)                      | 14 (38)                  | 12 (39)                          | 2 (9)                    |
| Disease progression                 | 4 (5)                                | 9 (13)                    | 2 (11)                       | 8 (24)                    | 3 (9)                        | 9 (24)                   | 4 (13)                           | 3 (14)                   |
| NE/not done*                        | 6 (8)                                | 20 (29)                   | 3 (16)                       | 13 (39)                   | 3 (9)                        | 12 (32)                  | 3 (10)                           | 17 (77)                  |

|               | Preselection: Azacitidine<br>(n=142) |                       | Preselection: IDAC<br>(n=52) |                | Preselection: LDAC<br>(n=72) |                | Preselection: BSC only<br>(n=53) |                    |
|---------------|--------------------------------------|-----------------------|------------------------------|----------------|------------------------------|----------------|----------------------------------|--------------------|
|               | Enasidenib<br>(n=73)                 | Azacitidine<br>(n=69) | Enasidenib<br>(n=19)         | IDAC<br>(n=33) | Enasidenib<br>(n=35)         | LDAC<br>(n=37) | Enasidenib<br>(n=31)             | BSC only<br>(n=22) |
| Any HI, n (%) | 37 (51)                              | 10 (14)               | 10 (53)                      | 2 (6)          | 12 (34)                      | 5 (14)         | 8 (26)                           | 1 (5)              |
| HI-erythroid  | 13 (18)                              | 5 (7)                 | 3 (16)                       | 1 (3)          | 2 (6)                        | 3 (8)          | 3 (10)                           | 0                  |
| HI-neutrophil | 33 (45)                              | 6 (9)                 | 7 (37)                       | 2 (6)          | 10 (29)                      | 4 (11)         | 7 (23)                           | 1 (5)              |
| HI-platelet   | 16 (22)                              | 4 (6)                 | 4 (21)                       | 2 (6)          | 7 (20)                       | 1 (3)          | 4 (13)                           | 0                  |

OS was estimated using Kaplan-Meier methods and compared between arms with HRs and 95% CIs from Cox proportional hazards regression models and *P* values from stratified log-rank tests. The 95% CIs for the 1-year OS differences were derived using Greenwood's variance estimate. EFS was estimated by Kaplan-Meier methods and compared between arms with HR and 95% CIs from a Cox proportional hazards regression model and *P* value from stratified log-rank test. ORR included CR, CRi/CRp, PR, and MLFS, per IWG 2003 response criteria for AML. Response rates were compared for enasidenib vs CCR by OR from a logistic regression model and *P* value from a Cochran-Mantel-Haenszel test.

AML, acute myeloid leukemia; BSC, best supportive care; CCR, conventional care regimen; CI, confidence interval; CR, complete remission; CRi, CR with incomplete hematologic recovery; CRp, CR with incomplete platelet recovery; EFS, event-free survival; ENA, enasidenib; HI, hematologic improvement; HR, hazard ratio; IDAC, intermediate-dose cytarabine; IWG, International Working Group; LDAC, low-dose cytarabine; MLFS, morphologic leukemia-free state; NE, not estimable; OR, odds ratio; ORR, overall response rate; OS, overall survival; PR, partial remission.

\*No post-baseline bone marrow collected. Patients are considered non-responders and included in the denominator for response assessments.

**Supplemental Table 4. Treatment-related grade  $\geq 3$  treatment-emergent adverse events in  $>2\%$  of patients in either treatment arm and corresponding exposure-adjusted adverse event rates (EAERs)**

|                                                             | Enasidenib<br>n=157<br>101.0 patient-years of<br>treatment exposure |                      | CCR<br>n=141<br>47.6 patient-years of<br>treatment exposure |                      |
|-------------------------------------------------------------|---------------------------------------------------------------------|----------------------|-------------------------------------------------------------|----------------------|
|                                                             | Patients,<br>n (%)                                                  | Events,<br>n (EAER*) | Patients,<br>n (%)                                          | Events,<br>n (EAER*) |
| <b>Any grade <math>\geq 3</math> treatment-related TEAE</b> | <b>74 (47.1)</b>                                                    | <b>175</b>           | <b>49 (34.8)</b>                                            | <b>151</b>           |
| Thrombocytopenia                                            | 16 (10.2)                                                           | 25 (24.7)            | 12 (8.5)                                                    | 25 (52.5)            |
| Blood bilirubin increased                                   | 13 (8.3)                                                            | 13 (12.9)            | 0                                                           | 0                    |
| Neutropenia                                                 | 9 (5.7)                                                             | 18 (17.8)            | 15 (10.6)                                                   | 39 (81.9)            |
| Differentiation syndrome                                    | 8 (5.1)                                                             | 8 (7.9)              | 0                                                           | 0                    |
| Anemia                                                      | 7 (4.5)                                                             | 13 [12.9]            | 7 (5.0)                                                     | 9 (18.9)             |
| Febrile neutropenia                                         | 4 (2.5)                                                             | 7 (6.9)              | 17 (12.1)                                                   | 21 (44.1)            |
| Diarrhea                                                    | 4 (2.5)                                                             | 4 (4.0)              | 0                                                           | 0                    |
| Pneumonia                                                   | 1 (0.6)                                                             | 1 (1.0)              | 6 (4.3)                                                     | 6 (12.6)             |

CCR, conventional care regimen; EAER, exposure-adjusted adverse event; TEAE, treatment-emergent adverse event.

\*The EAER per 100 patient-years of exposure and is calculated as  $100 \times (n/TPY)$ , where n is the total number of events in each group and TPY is total patient-years of exposure.

**Supplemental Figure 1. Preselection and randomization**

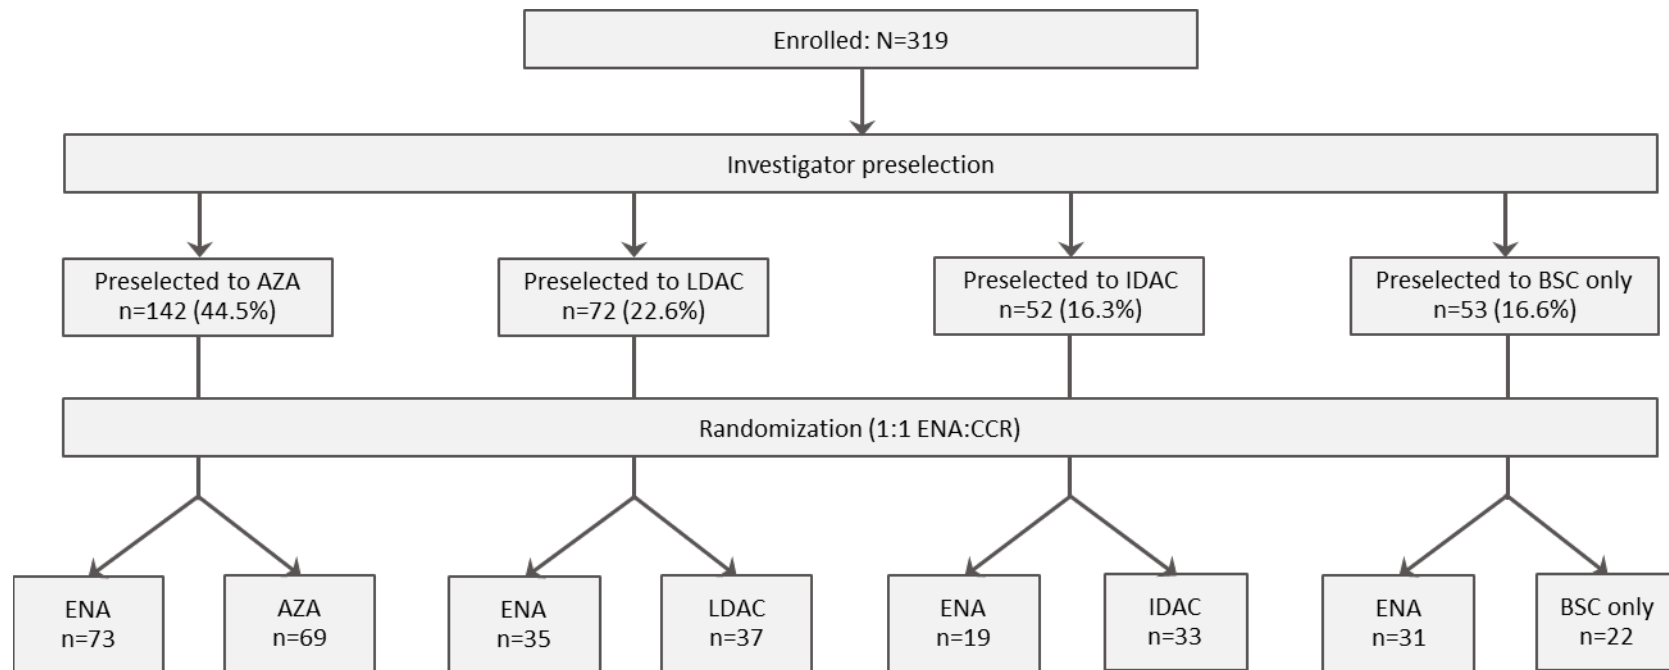

**Supplemental Figure 2. 1-year survival rates in patient subgroups defined by baseline characteristics and prior AML treatment history**

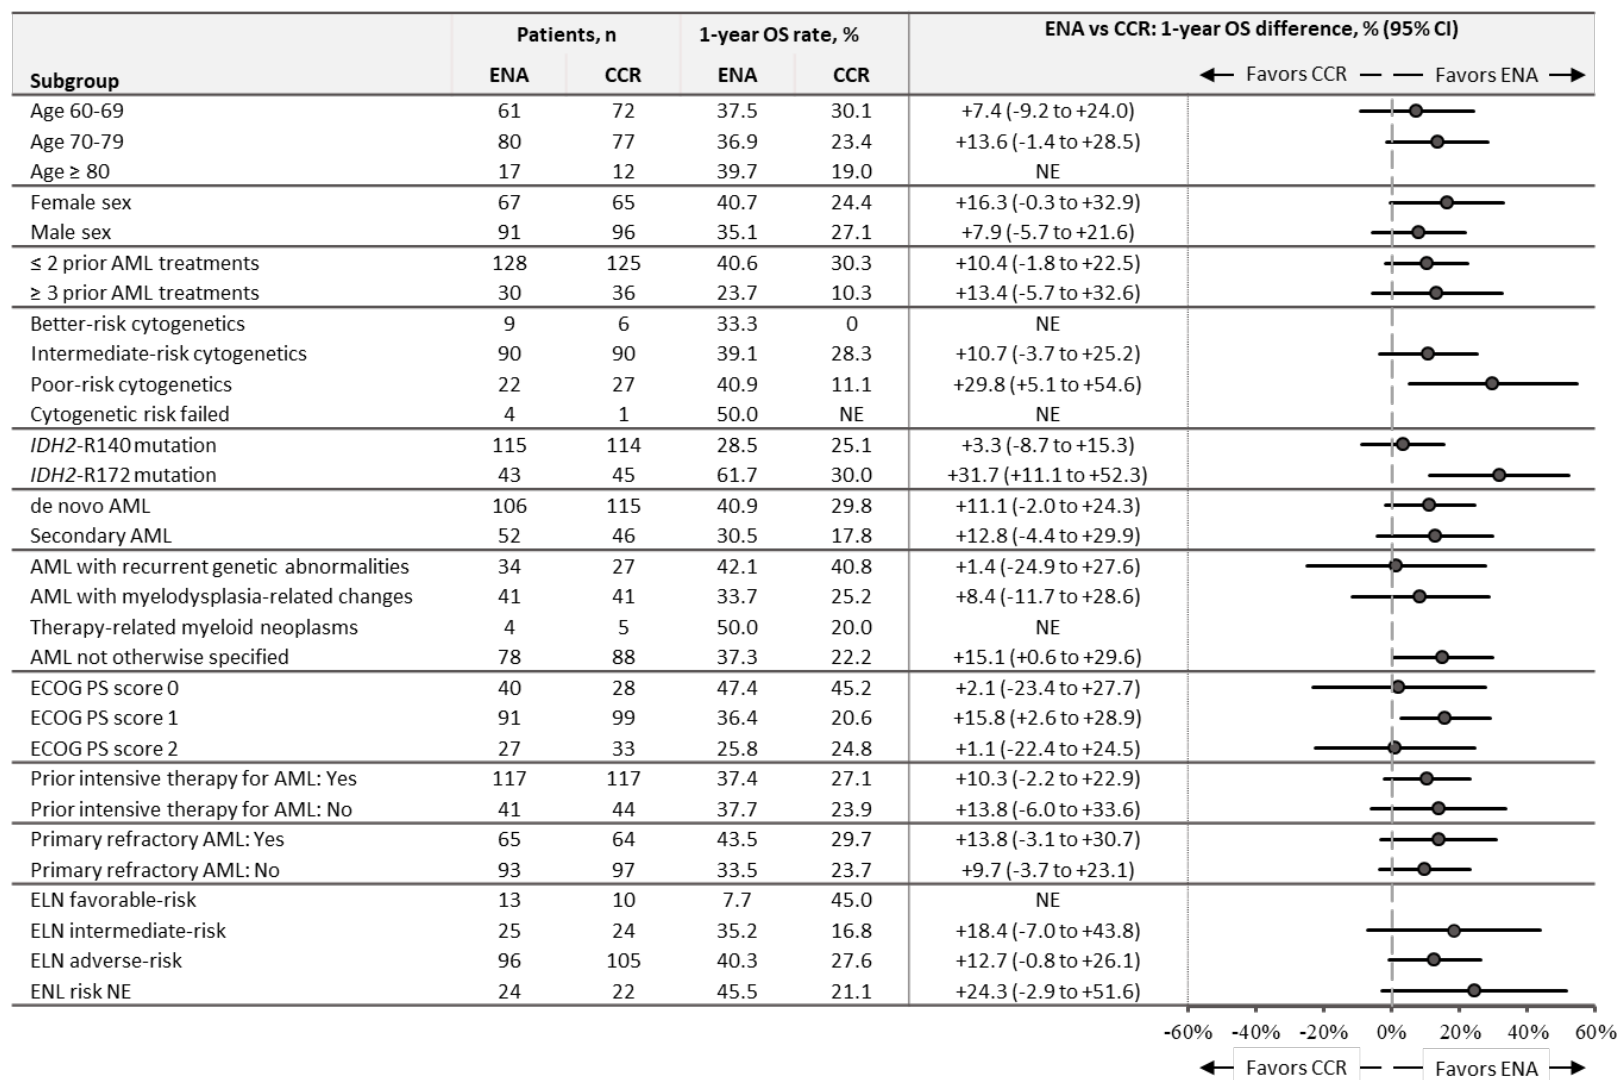

AML, acute myeloid leukemia; CCR, conventional care regimen; CI, confidence interval; ECOG PS, Eastern Cooperative Oncology Group performance status; ELN, European LeukemiaNet; ENA, enasidenib; NE, not estimatable; OS, overall survival.



**Supplemental Figure 3. Median overall survival in the modified intention-to-treat (mITT) population**

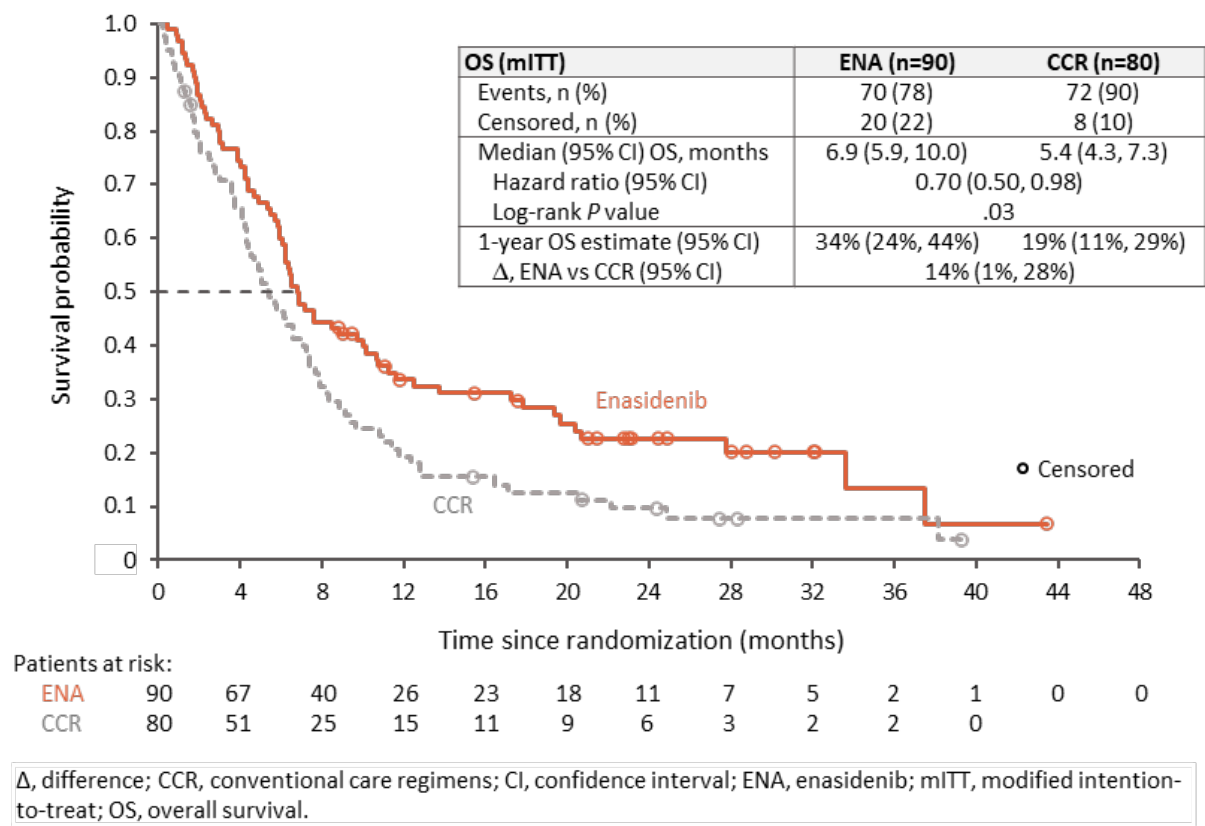

**Supplemental Figure 4. Baseline 2-HG concentration (A) and minimum baseline-normalized 2-HG concentrations on study (B)**

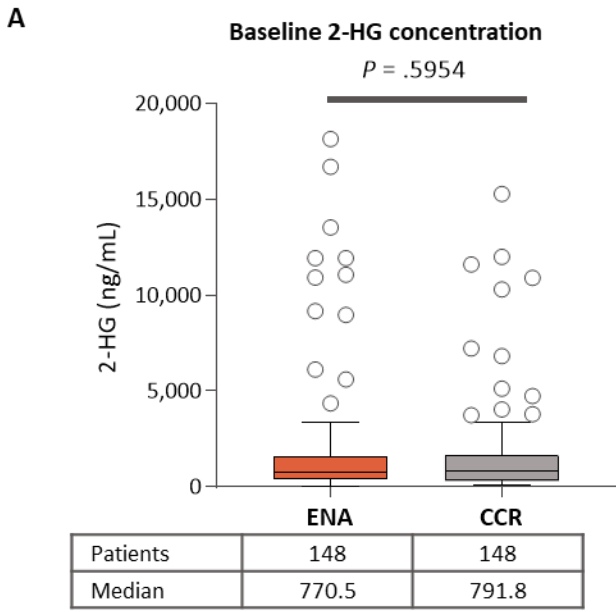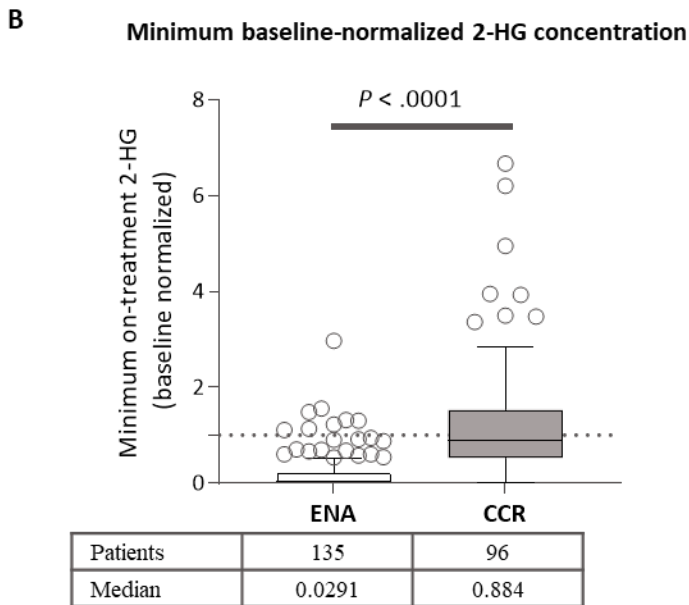

Horizontal bars denote median; error bars denote Tukey's range; circles denote outliers.  
 2-HG, 2-hydroxyglutarate; CCR, conventional care regimen; ENA, enasidenib.

**Supplemental Figure 5. Minimum baseline-normalized 2-HG concentrations on study by treatment arm and clinical response category**

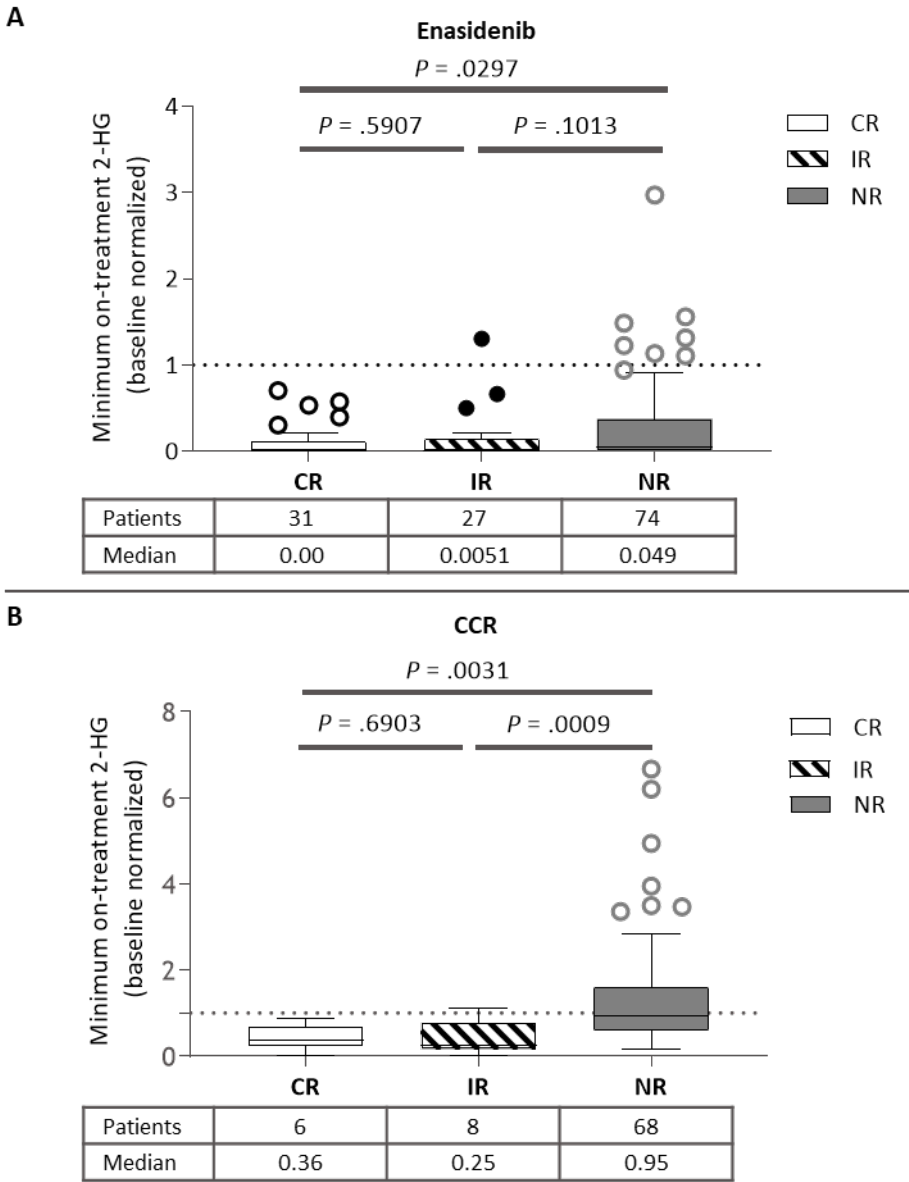

Horizontal bars denote median 2-HG concentration at baseline. Error bars denote Tukey's range and circles denote outliers. The p-values were calculated using Mann-Whitney test. Incomplete response (IR) includes CR with incomplete blood count or platelet recovery (CRi/CRp), partial remission (PR), and morphologic leukemia-free state (MLFS). CCR, conventional care regimen; CR, complete remission; IR, incomplete response; NR, no response.

**Supplemental Figure 6. Minimum baseline-normalized IDH2 VAF on study in the enasidenib (A) and CCR (B) treatment arms**

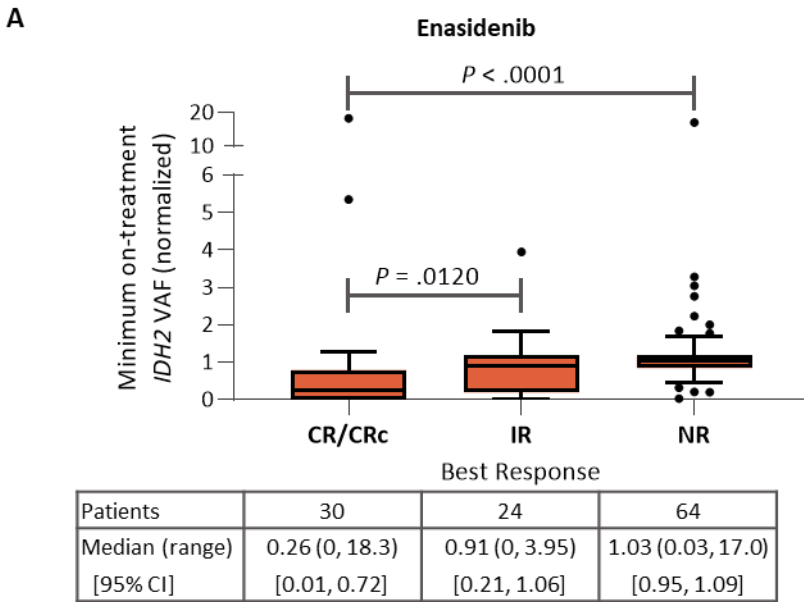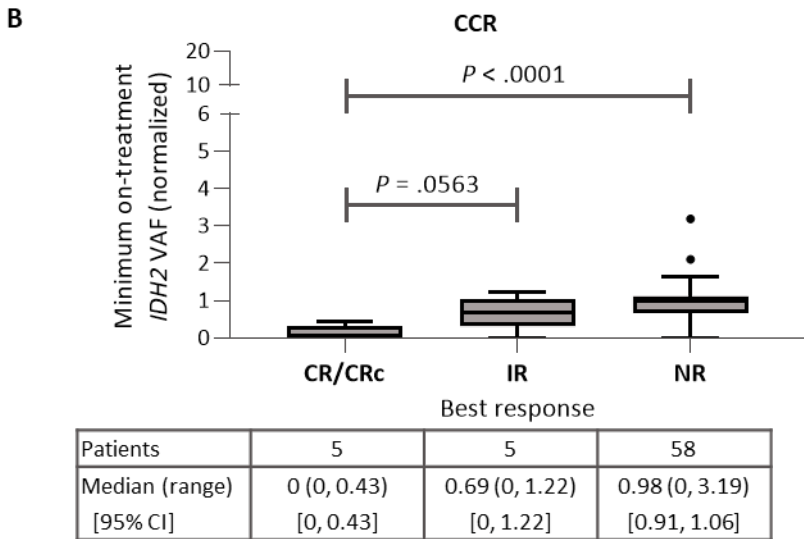

Horizontal bars denote median baseline IDH2 VAF. Error bars denote Tukey's range and circles denote outliers. The p-values were calculated using Mann-Whitney test. IR includes CR with incomplete blood count or platelet recovery (CRI/CRp), partial remission (PR), and morphologic leukemia-free state (MLFS). CCR, conventional care regimen; CR, complete remission; CRc, cytogenetic complete remission; IR, incomplete response; NR, no response; VAF, variant allele frequency.
